# Supplementary material for: Bmi1 regulates self-renewal and epithelial to mesenchymal transition in breast cancer cells through Nanog
Source: PubMed Central journal article supplement (PMC4223733; doi:10.1186/1471-2407-14-785), 2014-10-28
Supplement: 12885_2014_4966_MOESM1_ESM.pdf [file 12885_2014_4966_MOESM1_ESM.pdf]

## Supplementary Figure 1

| Gene name     | Primer sequence                   |
|---------------|-----------------------------------|
| ABCC1-FW      | 5'-AGCCGGTGAAGTTGTGTAC -3'        |
| ABCC1-RV      | 5'-TGACGAAGCAGATGTGGAAG -3'       |
| ABCG2-FW      | 5'-GCAGATGCCTTCTTCGTTATG -3'      |
| ABCG2-RV      | 5'-TCTTCGCCAGTACATGTTGC -3'       |
| AXIN2-FW      | 5'-CCAGACTCAGTGGGAAGAGC -3'       |
| AXIN2-RV      | 5'- AAGAGACAGGCATGGGTTTG -3'      |
| BMI1-FW       | 5'- CCAGGGCTTTTCAAAAATGA -3'      |
| BMI1-RV       | 5'-CCGATCCAATCTGTTCTGGT -3'       |
| CD44 -FW      | 5'- GGGATTGGTTTTCATGGTTG -3'      |
| CD44 -RV      | 5'-GTGTGGTTGAAATGGTGCTG -3'       |
| Gli-1-FW      | 5' -GTGCAAGTCAAGCCAGAACA -3'      |
| Gli-1-RV      | 5'-ATAGGGGCCTGACTGGAGAT -3'       |
| Gli-2-FW      | 5'-TGGAATTTGGAAGTGGCTTC -3'       |
| Gli-2-RV      | 5'-CCTCATTAAGGCCAAGGTCA -3'       |
| Hes-1-FW      | 5'-TTCCCTCCGGACTCTAAACA -3'       |
| Hes-1-RV      | 5'-CAAACATCTTTGGCATCACA -3'       |
| Hes-5-FW      | 5'- GCCGTTTTAGGACAATCAGG -3'      |
| Hes-5-RV      | 5'-GAGTTCGGCCTTCACAAAAG -3'       |
| HPRT-FW       | 5'- TGCTCGAGATGTGATGAAGG -3'      |
| HPRT-RV       | 5'- TCCCCTGTTGACTGGTCATT -3'      |
| Nanog-FW      | 5'- CCTCCTCCATGGATCTGCTTATTCA -3' |
| Nanog-RV      | 5'-CAGGTCTTCACCTGTTTGTAG -3'      |
| N-Cadherin-FW | 5'-GACAATGCCCCCTCAAGTGTT -3'      |
| N-Cadherin-RV | 5'-CCATTAAGCCGAGTGATGGT -3'       |
| Oct4-FW       | 5'-CGACCATCTGCCGCTTTGAG-3'        |
| Oct4-RV       | 5'- CCCCCTGTCCCCCATTCCCTA -3'     |
| RPL-FW        | 5'-TTAAATCCTTGAGGGGTACA-3'        |
| RPL-RV        | 5'-ACGGGACTTCTAAAAGGAAC-3'        |
| Sox2-FW       | 5'-CCCCCGGCGGCAATAGCA -3'         |
| Sox2-RV       | 5'-TCGGCGCCGGGGACATACAT -3'       |
| Twist1-FW     | 5'-GTCCGCAGTCTTACGAGGAG -3'       |
| Twist1-RV     | 5'-CCAGCTTGAGGGTCTGAATC -3'       |
| Vimentin-FW   | 5'-GAGAAGTTTGCCGTTGAAGC -3'       |
| Vimentin-RV   | 5'-TCCAGCAGCTTCCTGTAGGT -3'       |

Supplementary Figure 1. The sequence of the primers used in the study.

## Supplementary Figure 2

shBmi1- Sense:

CCGGAACCAGACCACTACTGAATATCTCGAGATATTCAGTAGTGGTCTG  
GTTTTTTTG

shBmi1- Anti Sense:

AATTCAAAAAAACCAGACCACTACTGAATATCTCGAGATATTCAGTAGT  
GGTCTGGTT

Supplementary Figure 2. Nucleotide sequence of Bmi1 shRNA used in the study.

### Supplementary Figure 3

| Sl No. | Tissue No. | Bmi1 intensity |
|--------|------------|----------------|
| 1      | BT101      | +              |
| 2      | BT102      | +              |
| 3      | BT103      | +              |
| 4      | BT104      | +              |
| 5      | BT105      | +              |
| 6      | BT106      | +              |
| 7      | BT107      | +              |
| 8      | BT108      | +              |
| 9      | BT109      | +              |
| 10     | BT110      | ++             |
| 11     | BT111      | ++             |
| 12     | BT112      | ++             |
| 13     | BT113      | ++             |
| 14     | BT114      | ++             |
| 15     | BT115      | ++             |
| 16     | BT116      | ++             |
| 17     | BT117      | ++             |
| 18     | BT118      | ++             |
| 19     | BT119      | ++             |
| 20     | BT120      | ++             |
| 21     | BT121      | +++            |
| 22     | BT122      | +++            |
| 23     | BT123      | +++            |
| 24     | BT124      | +++            |
| 25     | BT125      | +++            |

Supplementary Figure 3. The status of Bmi1 protein levels in 25 primary breast adenocarcinoma samples as analyzed by immunohistochemistry. High: +++, Medium: ++, Low: +.

Supplementary Figure 4

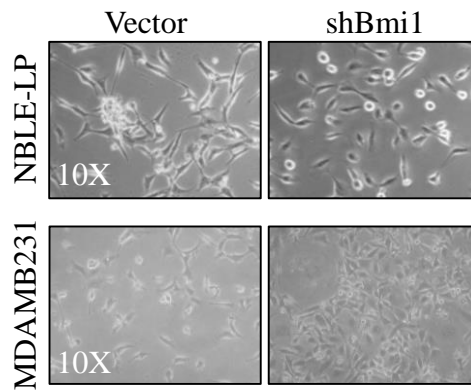

Supplementary Figure 4. Representative images showing morphology of NBLE-LP and MDAMB231 cells with vector alone or upon Bmi1 knockdown.

A

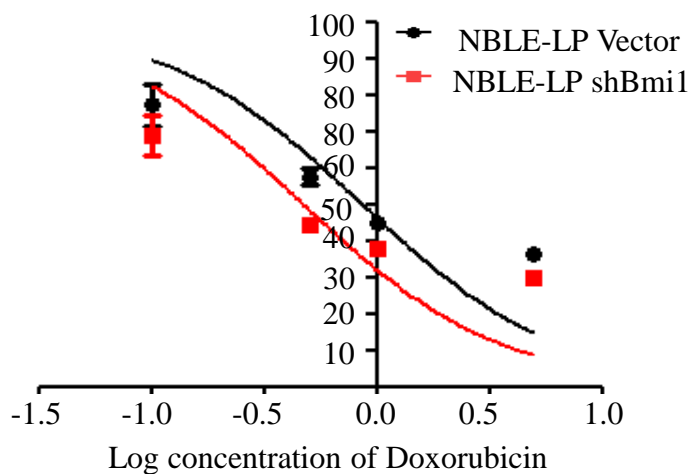

|                  | NBLE-LP Vector | NBLE-LP shBmi1 |
|------------------|----------------|----------------|
| IC <sub>50</sub> | 0.8534         | 0.4674         |

B

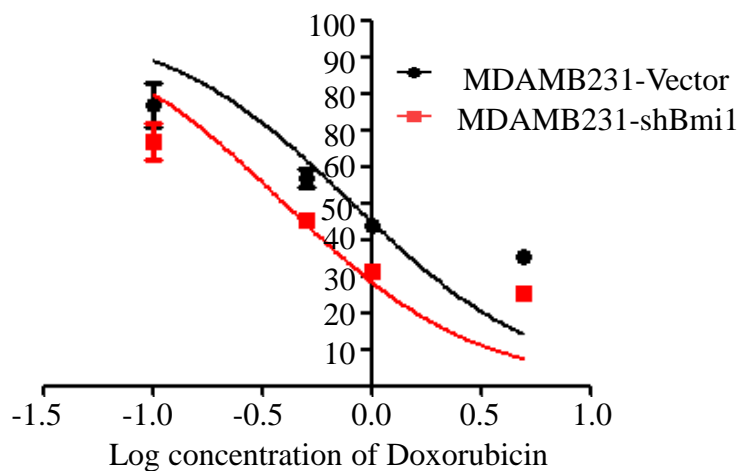

|                  | MDAMB231-Vector | MDAMB231-shBmi1 |
|------------------|-----------------|-----------------|
| IC <sub>50</sub> | 0.8084          | 0.3955          |

Supplementary Figure 5. Non-linear regression curve (Curve fit) to calculate IC<sub>50</sub> value of doxorubicin in NBLE-LP vector and NBLE-LP shBmi1 stable cell lines (A) and MDAMB231-Vector and MDAMB231-shBmi1 stable cell lines (B); n=3, error bars indicate S.D.
